# Supplementary figures and images for: A symbolic–visual advertising framework for engaging China’s generation Z in sustainable consumption
Source: Research Square preprint supplement (doi:10.21203/rs.3.rs-7015299/v1), 2025-08-25

Appendix A


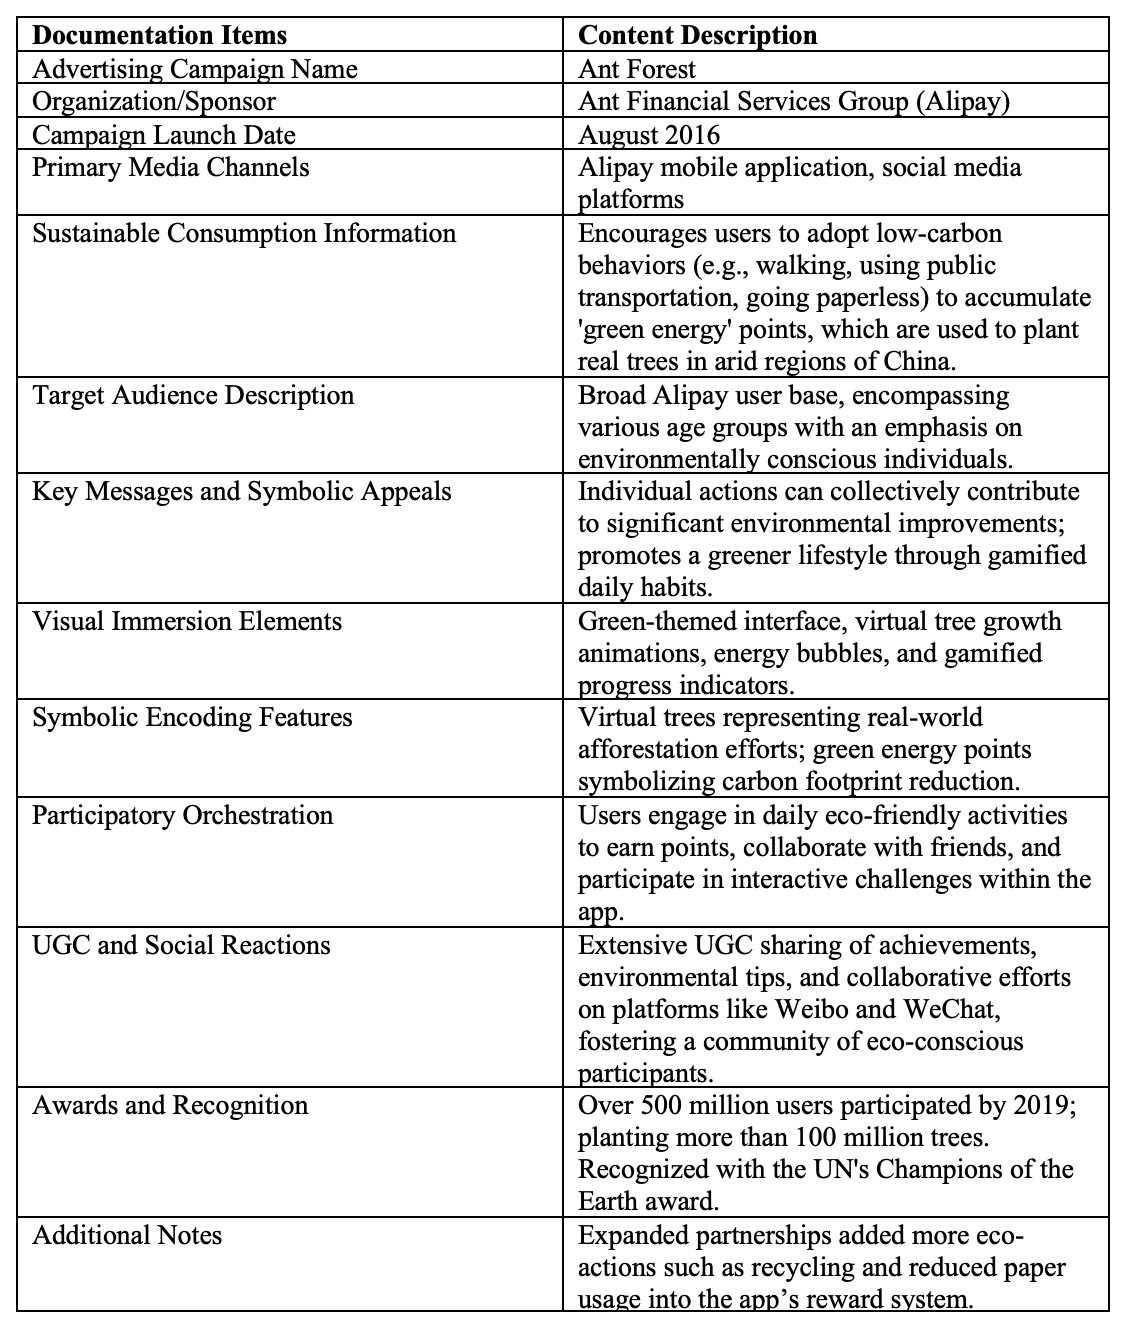


Appendix B


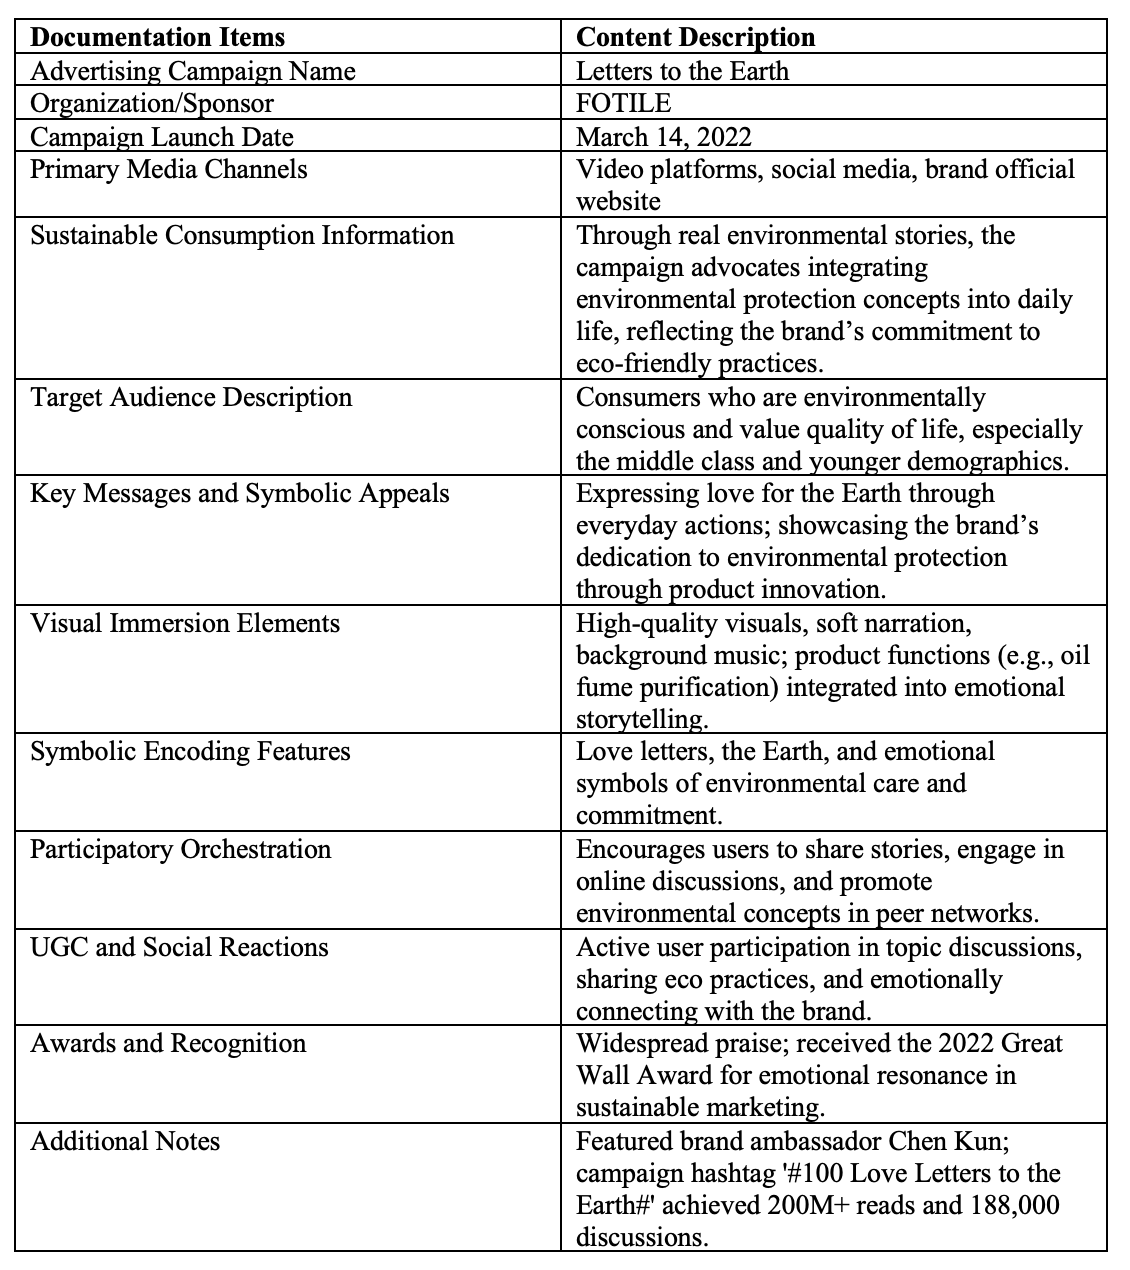


Appendix C


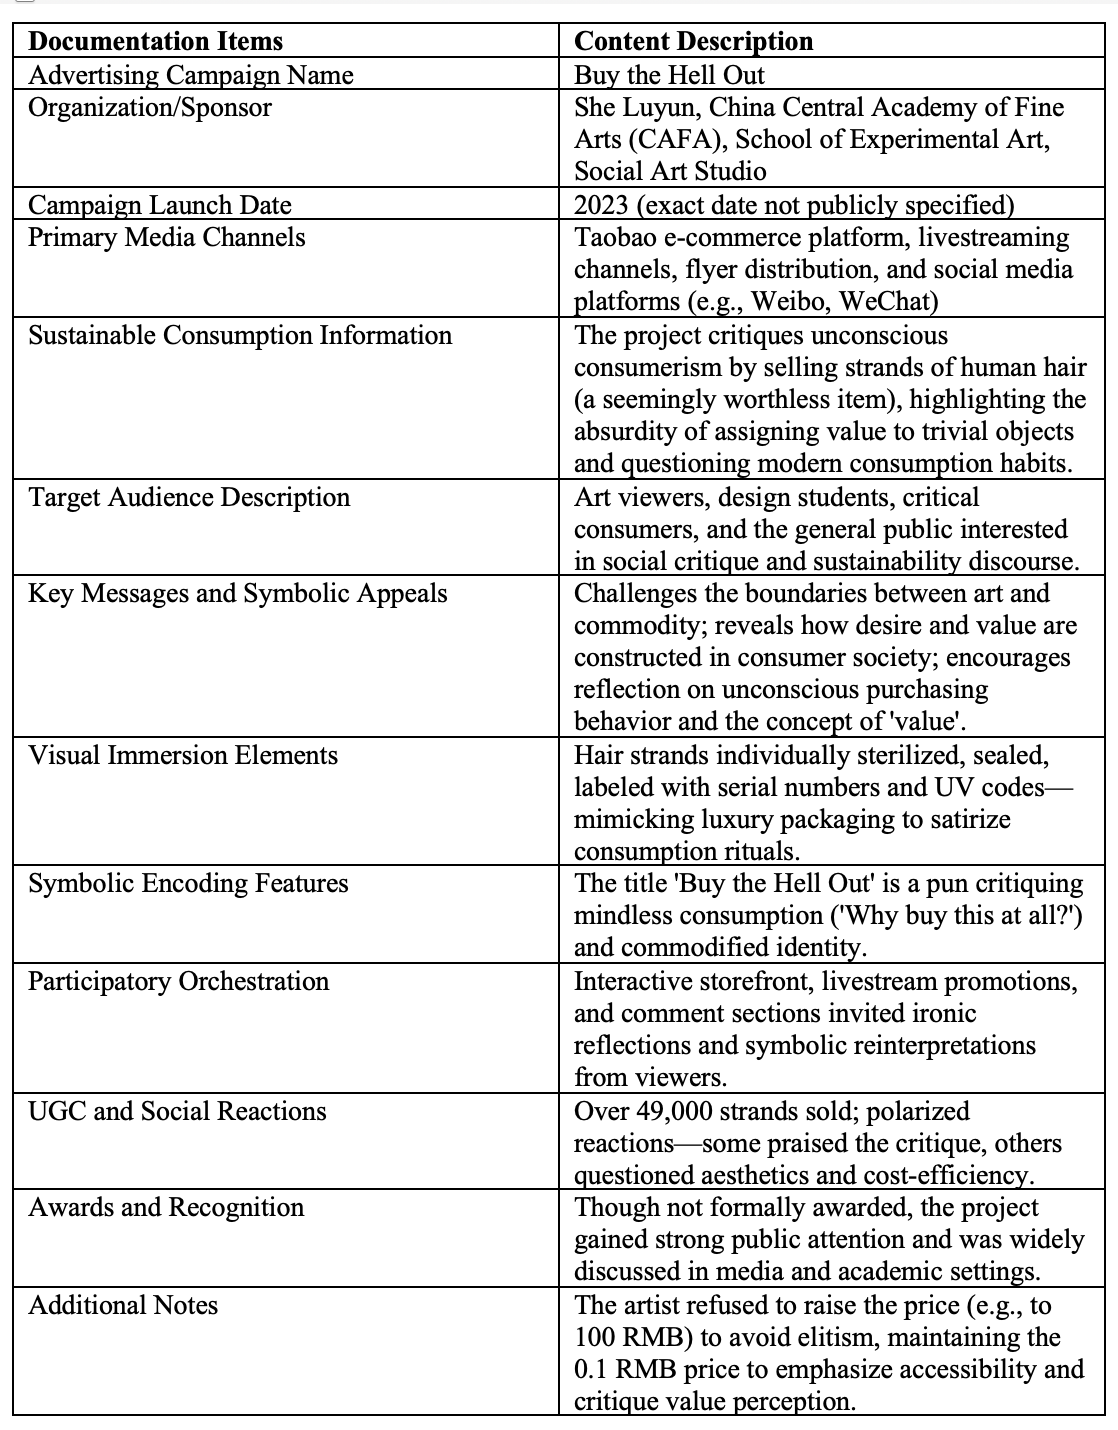

Supplement: Supplementary file 1 [file 5ed1e64115a9c38d291a87a5.docx]
